# Supplementary material
Source: MDPI journal article supplement (https://www.mdpi.com/2073-4352/13/4/595)
Supplement: s1 [file s1]

## Measurements of PL spectra, lifetime and quantum yield

PL spectra were recorded on an Edinburgh Instruments (EI) FLS1000 spectrofluorometer equipped with a continuous (450 W) xenon lamp. The excitation wavelength is 365 nm.

PL decay curves were recorded on a fluorescent lifetime spectrometer (FLS1000) based on a time correlated single photon counting technique under the excitation of 375 nm picosecond laser.

PLQY is defined as the ratio of the emitted photons to the absorbed photons, and was measured by a spectrofluorometer (FLS1000). An integrating sphere was mounted on the spectrofluorometer with the entrance and exit ports located in 90° geometry. The PiG sample was located in the center of the integrating sphere. All the recorded spectroscopic data were corrected for the spectral responses of both the spectrofluorometer and the integrating sphere. The responses of the detecting systems (integrating sphere, monochromators and detectors) in photon flux were determined using a calibrated tungsten lamp. Based on this setup, PLQY is calculated by the following equation:

$$\eta = \frac{\text{number of photons emitted}}{\text{number of photons absorbed}} = \frac{L_{\text{sample}}}{E_{\text{reference}} - E_{\text{sample}}}$$

where  $\eta$  represents QY,  $L_{\text{sample}}$  the emission intensity,  $E_{\text{reference}}$  and  $E_{\text{sample}}$  the intensities of the excitation light not absorbed by the reference and the sample respectively. The precursor glass was used as the standard reference. The difference in integrated areas between the sample and the reference represents the number of the absorbed photons. The photons emitted were determined by integrating the area of the emission band.

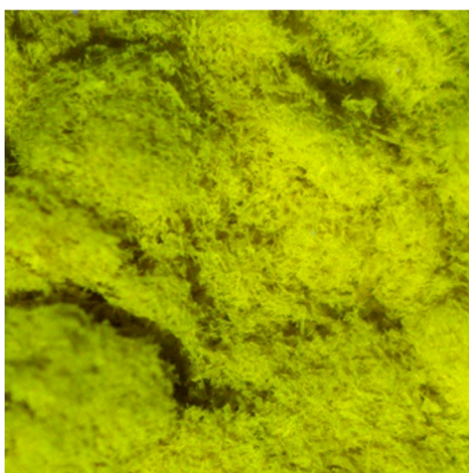

**Figure S1.** Fluorescence image of 9-AA powder (under 365nm UV-light).

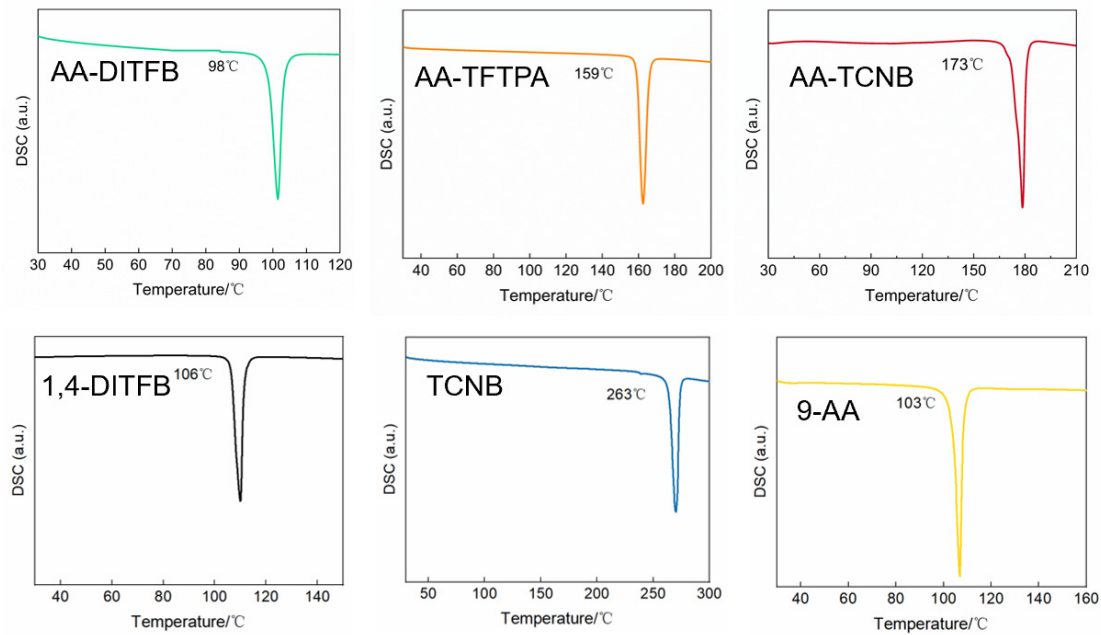

**Figure S2.** DSC of single components and cocrystals.

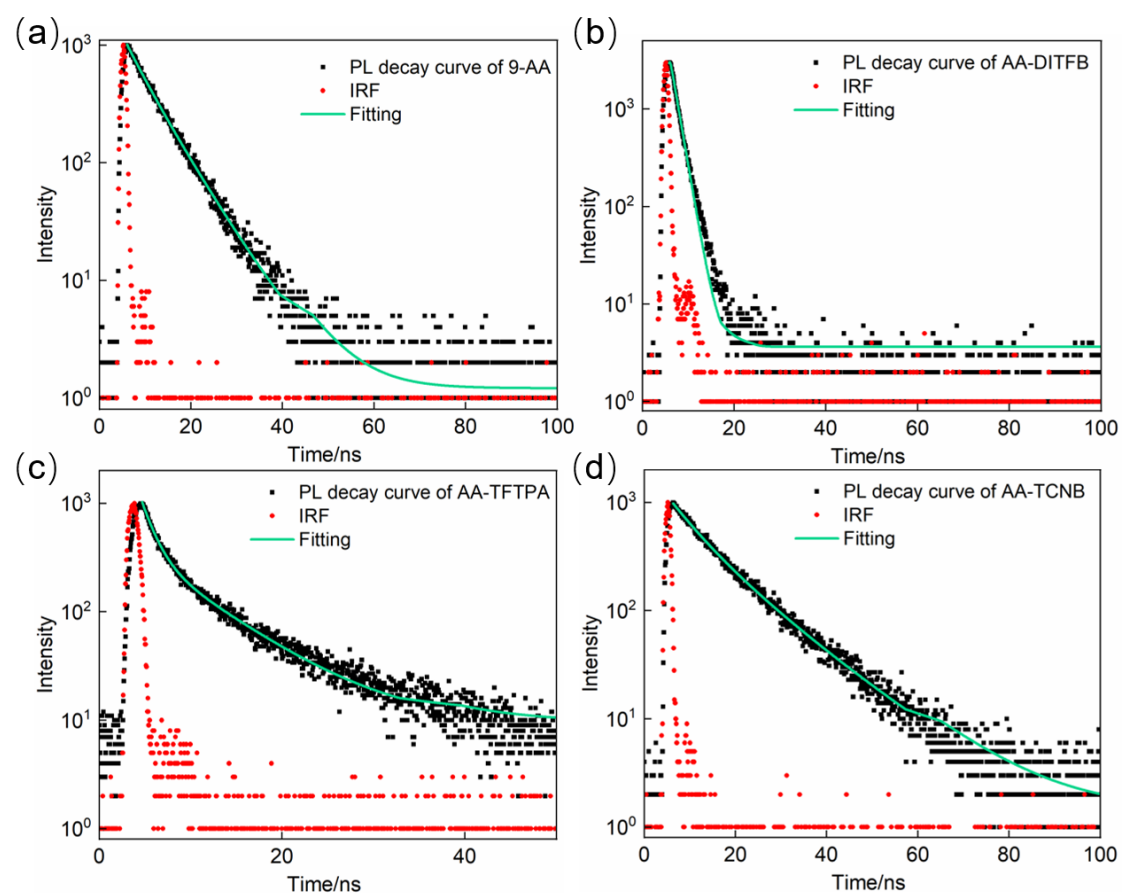

**Figure S3. PL decay curves of (a) 9-AA, (b) AA-DITFB, (c) AA-TFPA and (d) AA-TCNB.**

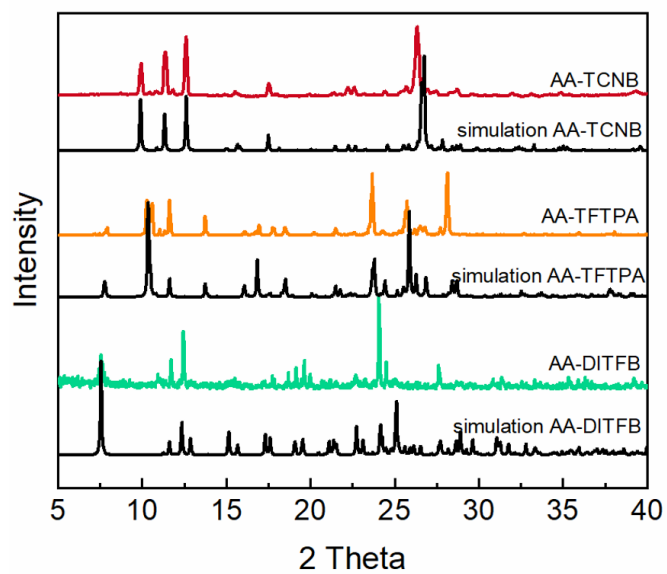

**Figure S4.** Comparison of experimentally measured PXRD and single crystal simulated PXRD.

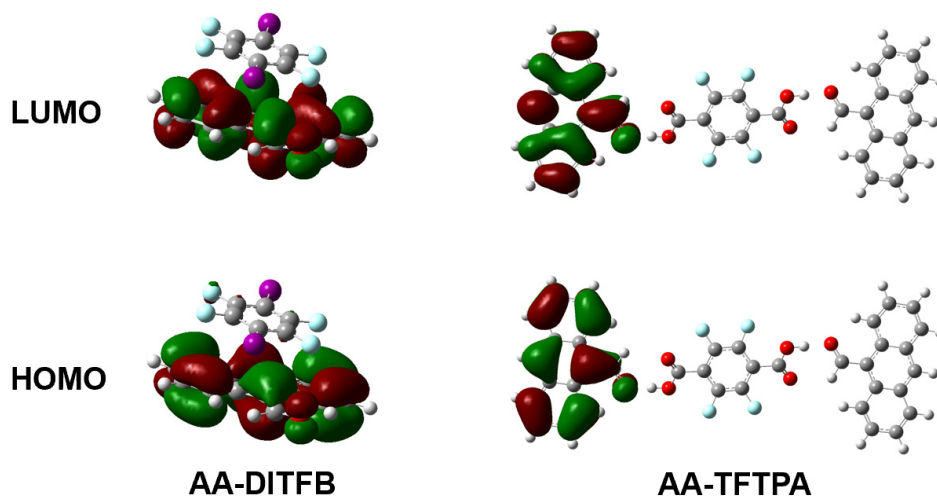

**Figure S5.** Molecular orbitals of AA-DITFB and AA-TFTPA.

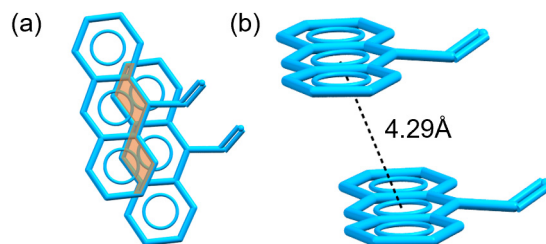

**Figure S6.** (a) The degree of overlap and (b) the distance between the centroids of adjacent 9-AA molecules in 9-AA crystals.

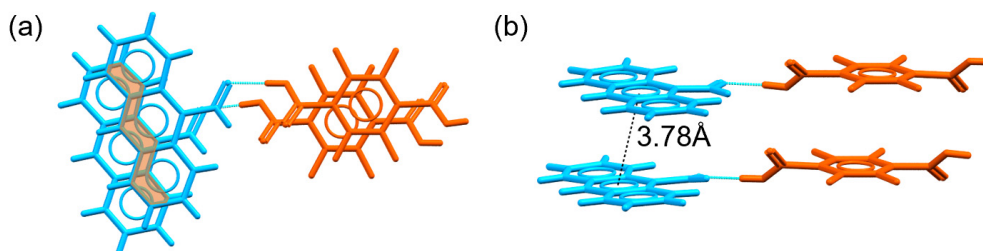

**Figure S7.** (a) The degree of overlap and (b) the distance between the centroids of adjacent 9-AA molecules in AA-TFTPA crystals.

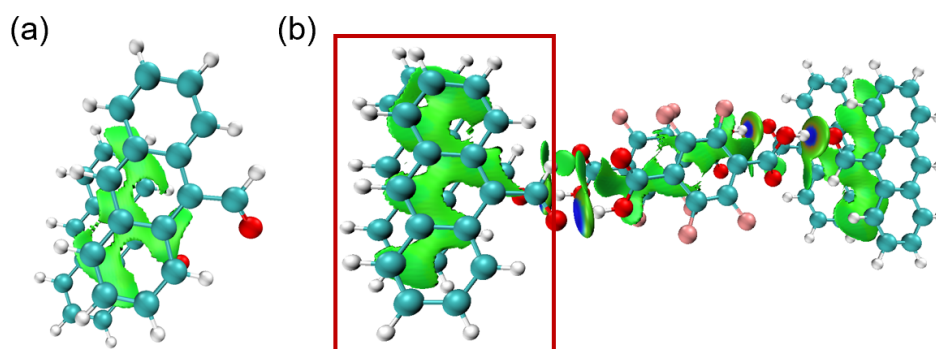

**Figure S8.** IGMH analysis of (a) 9-AA and (b) AA-TFTPA.

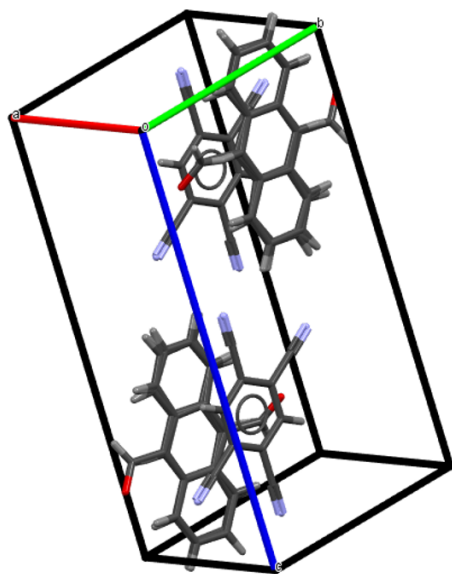

**Figure S9.** Unit cell of AA-TCNB.

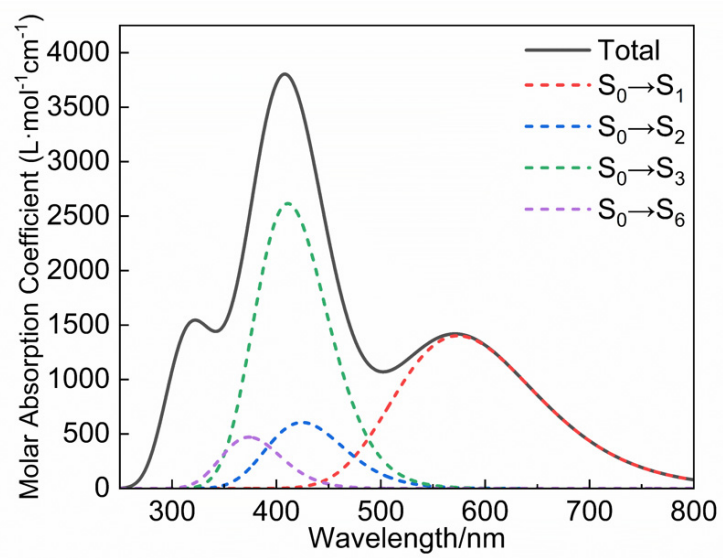

**Figure S10.** Absorption spectra of AA-TCNB calculated by TDDFT.

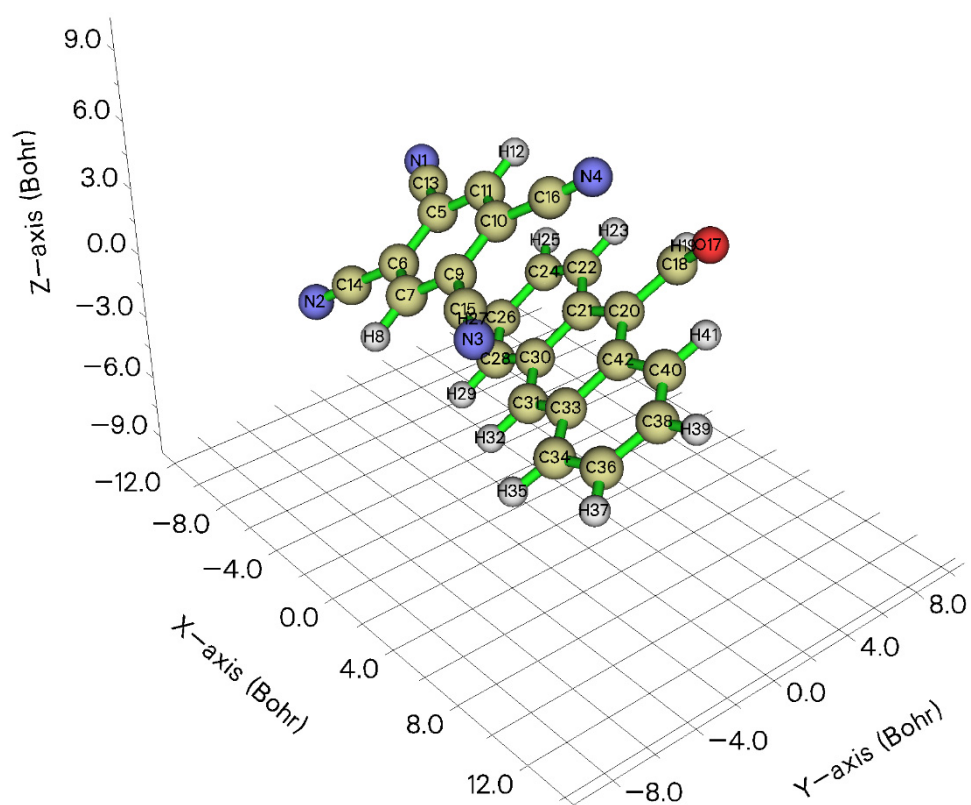

**Figure S11.** Cartesian coordinates of the optimized geometries of AA-TCNB.

**Table S1.** Crystallographic data of AA-DITFB, AA-TFTPA and AA-TCNB

| Compound                                                      | AA-DITFB                                                        | AA-TFTPA                                                      | AA-TCNB                                          |
|---------------------------------------------------------------|-----------------------------------------------------------------|---------------------------------------------------------------|--------------------------------------------------|
| empirical formula                                             | C <sub>21</sub> H <sub>10</sub> F <sub>4</sub> I <sub>2</sub> O | C <sub>38</sub> H <sub>22</sub> F <sub>4</sub> O <sub>6</sub> | C <sub>25</sub> H <sub>12</sub> N <sub>4</sub> O |
| formula weight                                                | 608.09                                                          | 650.55                                                        | 384.39                                           |
| temperature (K)                                               | 113.15                                                          | 113.15                                                        | 113.15                                           |
| radiation                                                     | 0.71073                                                         | 0.71073                                                       | 0.71073                                          |
| crystal system                                                | monoclinic                                                      | monoclinic                                                    | triclinic                                        |
| space group                                                   | <i>P</i> 2 <sub>1</sub> / <i>n</i>                              | <i>P</i> 2 <sub>1</sub> / <i>c</i>                            | <i>P</i> <sub>1</sub>                            |
| a (Å)                                                         | 7.8562(2)                                                       | 10.8144(4)                                                    | 6.7855(5)                                        |
| b (Å)                                                         | 16.9242(3)                                                      | 12.4283(5)                                                    | 8.1332(7)                                        |
| c (Å)                                                         | 14.8075(4)                                                      | 21.9174(7)                                                    | 17.3701(16)                                      |
| α (°)                                                         | 90                                                              | 90                                                            | 96.489(7)                                        |
| β (°)                                                         | 103.962(3)                                                      | 97.987(3)                                                     | 94.769(7)                                        |
| γ (°)                                                         | 90                                                              | 90                                                            | 103.283(7)                                       |
| V(Å <sup>3</sup> )                                            | 1910.64(8)                                                      | 2917.22(19)                                                   | 921.08(14)                                       |
| <i>Z</i>                                                      | 4                                                               | 4                                                             | 2                                                |
| ρ <sub>calc</sub> (g/cm <sup>3</sup> )                        | 2.114                                                           | 1.481                                                         | 1.386                                            |
| F (000)                                                       | 1144                                                            | 1336                                                          | 396                                              |
| reflections collected                                         | 23381(R <sub>int</sub> =0.0403)                                 | 43318(R <sub>int</sub> =0.0540)                               | 3453(R <sub>int</sub> =0.0540)                   |
| goodness of fit indicator                                     | 1.105                                                           | 1.049                                                         | 1.080                                            |
| R <sub>1</sub> /wR <sub>2</sub> [ <i>I</i> > 2σ ( <i>I</i> )] | 0.0271/0.0634                                                   | 0.0585/0.1436                                                 | 0.0998/0.2357                                    |
| R <sub>1</sub> /wR <sub>2</sub> [all reflections]             | 0.0317/0.0654                                                   | 0.0869/0.1624                                                 | 0.1333/0.2532                                    |
| Maximum peak in<br>Final Diff. Map (Å <sup>3</sup> )          | 0.765e <sup>−</sup>                                             | 0.567e <sup>−</sup>                                           | 0.398e <sup>−</sup>                              |
| Minimum peak in<br>Final Diff. Map (Å <sup>3</sup> )          | − 0.641e <sup>−</sup>                                           | − 0.274e <sup>−</sup>                                         | − 0.442e <sup>−</sup>                            |
| Deposition Number                                             | 2246517                                                         | 2246518                                                       | 2246516                                          |



**Table S2. Major orbital transition contributions in excited states of AA-TCNB**

| State           | Orbital transition | Contribution | $E_{VA}/\text{eV}$ | $f$    | $\lambda/\text{nm}$ |
|-----------------|--------------------|--------------|--------------------|--------|---------------------|
| S <sub>1</sub>  | HOMO→LUMO          | 99.4%        | 2.16               | 0.0312 | 574                 |
| S <sub>2</sub>  | HOMO→LUMO+2        | 97.4%        | 2.9204             | 0.0135 | 424                 |
| S <sub>3</sub>  | HOMO→LUMO+1        | 88.2%        | 3.0172             | 0.0582 | 411                 |
| S <sub>4</sub>  | HOMO-1→LUMO        | 68.6%        | 3.1377             | 0.0081 | 395                 |
|                 | HOMO-1→LUMO+1      | 18.6%        |                    |        |                     |
|                 | HOMO→LUMO+1        | 7.1%         |                    |        |                     |
| S <sub>5</sub>  | HOMO-1→LUMO+1      | 59.4%        | 3.2214             | 0.0011 | 385                 |
|                 | HOMO-1→LUMO        | 24.4%        |                    |        |                     |
| S <sub>6</sub>  | HOMO-2→LUMO        | 94.1%        | 3.3179             | 0.0105 | 374                 |
| S <sub>7</sub>  | HOMO-3→LUMO        | 95.7%        | 3.6937             | 0.0039 | 336                 |
| S <sub>8</sub>  | HOMO-2→LUMO+1      | 62.0%        | 3.8211             | 0.0194 | 324                 |
|                 | HOMO→LUMO+3        | 27.1%        |                    |        |                     |
| S <sub>9</sub>  | HOMO-1→LUMO+2      | 95.2%        | 3.9676             | 0.0048 | 312                 |
| S <sub>10</sub> | HOMO-2→LUMO+2      | 97.4%        | 4.1153             | 0.0101 | 301                 |
